# Supplementary material for: TGFβ Programs Central Memory Differentiation in Ex Vivo –Stimulated Human T Cells
Source: Oxford University Press journal article supplement (doi:10.1158/2326-6066.cir-18-0691), 2019-07-15
Supplement: 23266066cir180691-sup-209646_2_supp_5527875_prmnl5.pdf [file 23266066cir180691-sup-209646_2_supp_5527875_prmnl5.pdf]

Figure S6

A

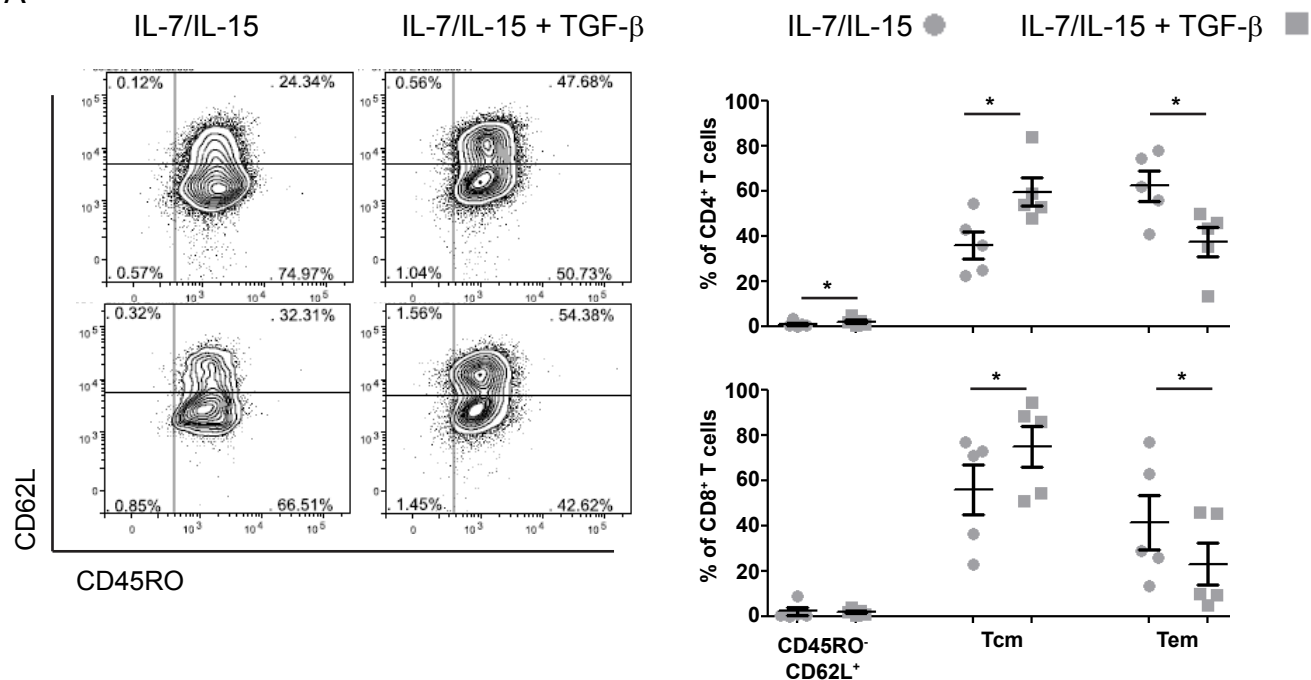

B

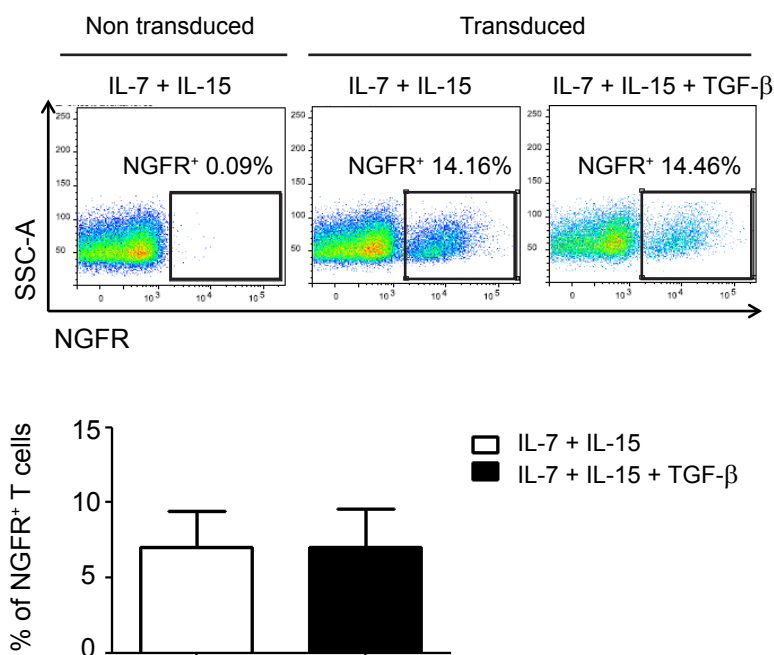

**Supplementary Figure S6. TGF- $\beta$  enhances Tcm differentiation when combined with IL-7 and IL-15 and does not alter T-cell transduction efficiency.** (A). Representative dot plots of Tcm (top right quadrant) and Tem (bottom right quadrant) after anti-CD3/CD28 stimulation (day 7) in the indicated conditions (IL-7/IL-15 +/- TGF- $\beta$ ) and compilation from 5 different donors. (B). Representative dot plots and compilation from 4 donors showing transduction efficiency obtained after a 7-day expansion culture using anti-CD3/CD28 stimulation and IL-7/IL-15. Transduced T cells are identified by the expression of low-affinity nerve growth factor receptor (NGFR, CD271) expression. SSC, side scatter. Error bars represent SEM. \* $p < 0.05$
